# Supplementary material for: MS-Based Metabolomics Reveals Metabolic Dysregulation in Erastin-Induced Gastric Adenocarcinoma Cells
Source: Research Square preprint supplement (doi:10.21203/rs.3.rs-927028/v1), 2021-09-30
Supplement: Supplementary file 1 [file 7500beb9fcd08ec6ac19ae34.xlsx]

## Sheet: 6h
PubChem_ID	KEGG_ID	Compound_Name	Condition_A_pvalue	Condition_A_foldchange	Condition_A_foldchange_direction
102175	NA	N6-Methyladenosine	4.33e-06	8	Up
278	C00169	Carbamoyl phosphate	6.53e-06	2.6	Up
96312	NA	6-O-MethylGuanosine	6.96e-06	3.8	Up
700653	NA	N-Acetyl-L-tryptophan	7.09e-06	2	Up
27476	C02494	1-Methyladenosine	9.02e-06	7.8	Up
96373	C04545	1-Methylguanosine	0.000133713	4.2	Up
439176	C00170	5-Methylthioadenosine	0.000349396	1.5	Up
1066	C03722	Quinolinic acid	0.000349822	1.8	Up
1188	C00385	Xanthine	0.000758655	2.6	Up
440122	C03794	Adenylosuccinate	0.000872886	1.7	Up
76406	C01073	N-Acetyl-beta-alanine	0.00175843	1.2	Up
64959	C01762	Xanthosine	0.00222929	1.9	Up
6021	C00294	Inosine	0.0160327	5.1	Up
150971	NA	2'-O-methylcytidine	0.0172825	1.7	Up
6802	C00387	Guanosine	0.0206483	3	Up
16757548	C00019	S-Adenosyl-L-methionine	0.0344044	1.4	Up
709625	NA	Cinnamoylglycine	0.0373959	1.6	Up
6029	C00299	Uridine	0.0489436	1.9	Up
1014	C00588	Phosphocholine	0.0514911	1	No Change
3382778	C01081	Thiamine monophosphate	0.0518745	1	No Change
111	C02642	N-Carbamoyl-beta-alanine	0.0560136	1	No Change
439224	C00386	Carnosine	0.0575695	1	No Change
188324	C01112	D-Arabinose 5-phosphate	0.0609331	1	No Change
683	C00236	3-Phospho-D-glyceroyl phosphate	0.0616775	1	No Change
135	C00156	4-hydroxybenzoate	0.061992	1	No Change
439278	C00631	D-Glycerate 2-phosphate	0.0658115	1	No Change
6057	C00082	L-Tyrosine	0.0665552	1	No Change
444972	C00122	Fumarate	0.0667773	1	No Change
73323	C00655	XMP	0.0692604	1	No Change
70912	C02710	N-Acetyl-L-leucine	0.0703816	1	No Change
743	C00489	Glutaric Acid	0.0743601	1	No Change
729	C00661	D-Glyceraldehyde 3-Phosphate	0.0744596	1	No Change
65103	C00286	dGTP	0.0760325	1	No Change
439220	C00361	dGDP	0.0777517	1	No Change
6723	C00847	4-Pyridoxic acid	0.0813785	1	No Change
1054	C00314	Pyridoxine	0.0823974	1	No Change
439213	C00329	D-Glucosamine	0.0824049	1	No Change
5816	C00788	(R)-(-)-Epinephrine	0.0837077	1	No Change
967	C00295	Orotate	0.0861562	1	No Change
5962	C00047	L-Lysine	0.0865037	1	No Change
8742	C00493	Shikimate	0.086667	1	No Change
724	C00597	D-Glycerate 3-phosphate	0.0890034	1	No Change
449	C00418	Mevalonate	0.089437	1	No Change
1738	C05582	Homovanillate	0.090857	1	No Change
16950	C03406	L-Argininosuccinate	0.0917335	1	No Change
6037	C00504	Folate	0.09561	1	No Change
493570	C00255	Riboflavin	0.105741	1	No Change
132862	C03884	Monomethyl-L-arginine	0.109598	1	No Change
1176	C00086	Urea	0.117663	1	No Change
6030	C00105	UMP	0.127195	1	No Change
5893	C00003	NAD	0.128485	1	No Change
5793	C00031	Glucose	0.133933	1	No Change
936	C00153	Nicotinamide	0.134416	1	No Change
1060	C00022	Pyruvate	0.140733	1	No Change
439165	C00103	D-Glucose 1-phosphate	0.145884	1	No Change
445408	NA	5-methyluridine	0.150402	1	No Change
10400369	C01094	D-Fructose 1-phosphate	0.151693	1	No Change
7339	C00119	5-Phospho-alpha-D-ribose 1-diphosphate	0.160458	1	No Change
6022	C00008	ADP	0.164055	1	No Change
439167	C00117	Ribose 5-Phosphate	0.164884	1	No Change
73318		8-hydroxy-2'-deoxyguanosine	0.17103	1	No Change
439174	C00140	N-acetylglucosamine	0.17676	1	No Change
1826	C05635	5-Hydroxyindoleacetate	0.176892	1	No Change
190	C00147	Adenine	0.179239	1	No Change
16500	C00498	ADP-glucose	0.18117	1	No Change
146302	C01345	dITP	0.182806	1	No Change
763	C00581	Guanidinoacetate	0.183622	1	No Change
51	C00026	2-Oxoglutarate	0.184466	1	No Change
668	C00111	Glycerone phosphate	0.184489	1	No Change
1150	C00398	Tryptamine	0.199272	1	No Change
92105	C01152	1-Methylhistidine	0.200721	1	No Change
6175	C00475	Cytidine	0.207818	1	No Change
317398	C04779	2'-O-methyladenosine	0.216158	1	No Change
643975	C00016	FAD	0.217986	1	No Change
22833512	C00005	NADPH	0.228664	1	No Change
5202	C00780	Serotonin	0.232582	1	No Change
964	C00168	hydroxypyruvate	0.236735	1	No Change
5810	C01157	Hydroxyproline	0.243614	1	No Change
988	C00864	Pantothenate	0.244628	1	No Change
196	C06104	Adipate	0.248981	1	No Change
890	C01204	Phytate	0.259154	1	No Change
440658	C05402	Melibiose	0.259707	1	No Change
6131	C00055	CMP	0.26157	1	No Change
145742	C00148	L-Proline	0.266951	1	No Change
790	C00262	Hypoxanthine	0.269544	1	No Change
811	C00490	Itaconate	0.271188	1	No Change
65063	C00365	dUMP	0.279562	1	No Change
6322	C00062	L-Arginine	0.27985	1	No Change
867	C00383	Malonate	0.291124	1	No Change
6106	C00123	L-Leucine	0.3028	1	No Change
6140	C00079	L-Phenylalanine	0.313613	1	No Change
750	C00037	Glycine	0.317308	1	No Change
227	C00108	Anthranilate	0.322532	1	No Change
6176	C00063	CTP	0.327372	1	No Change
5699	C02470	Xanthurenic acid	0.328774	1	No Change
122357	C00279	D-Erythrose 4-phosphate	0.33963	1	No Change
6306	C00407	L-Isoleucine	0.342227	1	No Change
6288	C00188	L-Threonine	0.345783	1	No Change
6947	C01988	O-Nitrophenol	0.351015	1	No Change
107689	C00186	Lactate	0.354613	1	No Change
10253	C07588	Salicylurate	0.355391	1	No Change
5951	C00065	L-Serine	0.366209	1	No Change
6830	C00044	GTP	0.366751	1	No Change
6804	C00144	GMP	0.372816	1	No Change
7405	C01879	Pyroglutamic acid	0.382142	1	No Change
161166	C00328	L-Kynurenine	0.38424	1	No Change
92258	C04148	Phenylacetylglutamine	0.390416	1	No Change
439194	C00258	Glycerate	0.390658	1	No Change
1175	C00366	Uric acid	0.397437	1	No Change
5287531	C16463	3',5'-Cyclic diGMP	0.409884	1	No Change
8582	C00130	IMP	0.411029	1	No Change
58	C00109	2-Oxobutanoate	0.425632	1	No Change
86	C00632	3-Hydroxyanthranilate	0.427259	1	No Change
6083	C00020	AMP	0.427553	1	No Change
12647	C00263	L-Homoserine	0.434546	1	No Change
6267	C00152	L-Asparagine	0.436733	1	No Change
11361	C02242	7-Methylguanine	0.443301	1	No Change
5789	C00214	Thymidine	0.446677	1	No Change
938	C00253	Nicotinic acid	0.469155	1	No Change
1145	C01104	Trimethylamine N-oxide	0.481003	1	No Change
22833559	C00281	Sedoheptulose 7-phosphate	0.488137	1	No Change
1174	C00106	Uracil	0.492293	1	No Change
10972	NA	N-AcetylGlycine	0.496998	1	No Change
30819	C06501	Phosphotyrosine	0.504012	1	No Change
187790	C00330	DeoxyGuanosine	0.50658	1	No Change
119	C00334	4-Aminobutyric acid	0.517038	1	No Change
1052	C00534	Pyridoxamine	0.52224	1	No Change
1081	C00815	2-Hydroxy-2-methylbutanedioic acid	0.523229	1	No Change
970	C00036	Oxaloacetate	0.525308	1	No Change
586	C00300	Creatine	0.525848	1	No Change
186	C00227	Acetyl phosphate	0.550593	1	No Change
9700	C00364	dTMP	0.552471	1	No Change
21863	NA	2-Furoylglycine	0.574165	1	No Change
247	C00719	Betaine	0.577151	1	No Change
17513	C04663	5-Aminoimidazole-4-carboxamide riboside	0.579636	1	No Change
5862	C00097	L-Cysteine	0.589096	1	No Change
60961	C00212	Adenosine	0.60782	1	No Change
764	C00242	Guanine	0.63711	1	No Change
107461	NA	N4-acetylcytidine	0.643287	1	No Change
65059	C00362	dGMP	0.664965	1	No Change
99558	NA	S-(2-Aminoethyl)-cysteine	0.685192	1	No Change
441187	C06814	D-Xylose-5-phosphate	0.692886	1	No Change
144	C01017	5-Hydroxytryptophan	0.702366	1	No Change
760	C00048	Glyoxylate	0.704572	1	No Change
1135	C00178	Thymine	0.711203	1	No Change
92904	C02043	Indole-3-lactic acid	0.712974	1	No Change
5950	C00041	L-Alanine	0.719026	1	No Change
6274	C00135	L-Histidine	0.737484	1	No Change
6305	C00078	L-Tryptophan	0.741651	1	No Change
91531	C06196	dIMP	0.757875	1	No Change
6287	C00183	L-Valine	0.763064	1	No Change
65058	C05512	Deoxyinosine	0.764165	1	No Change
67678	C00491	L-Cystine	0.77903	1	No Change
13279	C03592	5-methyl-2'-deoxycytidine	0.803043	1	No Change
12046	NA	2-Methylglutaric acid	0.841831	1	No Change
1123	C00245	Taurine	0.86466	1	No Change
13730	C00559	Deoxyadenosine	0.89373	1	No Change
6137	C00073	L-Methionine	0.945337	1	No Change
3614	C05127	1-Methylhistamine	0.946725	1	No Change
8583	C00081	ITP	0.957896	1	No Change
10267	C05378	beta-D-Fructose 1,6-bisphosphate	0.966106	1	No Change
863	C00248	Lipoamide	0.967927	1	No Change
5280498	C02214	Glutaconate	0.977232	1	No Change
5459822	C01205	(R)-3-Aminoisobutyrate	5.23e-09	1.4	Down
124886	C00051	Reduced glutathione	1.78e-08	7.1	Down
80283	C02356	(S)-2-Aminobutanoic acid	4.16e-08	1.5	Down
896	C01598	Melatonin	6.88e-08	13.3	Down
439162	C00093	Glycerol-3-Phosphate	5.06e-07	2	Down
13945	C00239	dCMP	8.23e-07	7.4	Down
487	C02170	Methyl malonate	8.37e-07	1.6	Down
33032	C00025	L-Glutamate	9.16e-07	1.2	Down
1130	C00378	Thiamine	1.37e-06	1.7	Down
1110	C00042	Succinate	1.65e-06	1.5	Down
975	C00127	Oxidized glutathione	3.74e-06	2.7	Down
500	C01035	4-Guanidinobutyric acid	4.19e-06	1.4	Down
305	C00114	Choline	1.04e-05	1.5	Down
2724480	C00318	Carnitine	1.06e-05	2.6	Down
1005	C00074	Phosphoenolpyruvate	1.52e-05	1.8	Down
311	C00158	Citrate	5.26e-05	1.8	Down
643757	C00417	cis-Aconitate	0.00016966	2	Down
17473	C00167	UDP-glucuronate	0.000228143	1.5	Down
11158091	C20565	Cyclic di-AMP	0.00023274	4.5	Down
445675	C00043	UDP-N-acetyl-D-glucosamine	0.000244602	1.5	Down
587	C02305	Creatine phosphate	0.000293728	1.9	Down
892	C00137	myo-Inositol	0.000473028	1.3	Down
5961	C00064	L-Glutamine	0.000554282	1.1	Down
440996	C00357	N-Acetyl-D-glucosamine 6-phosphate	0.000632954	1.6	Down
6857396	NA	Sialate	0.000638646	1.7	Down
439155	C00021	S-Adenosyl-L-homocysteine	0.000656689	1.8	Down
222656	C00149	L-Malate	0.000871905	1.2	Down
928	C00004	NADH	0.000960327	1.5	Down
440641	C05345	beta-D-Fructose 6-phosphate	0.000961662	1.8	Down
5960	C00049	L-Aspartate	0.00103869	1.4	Down
6076	C00575	cAMP	0.001089	2.8	Down
24758425	C01780	Aldosterone	0.00110313	1.5	Down
8977	C00035	GDP	0.0016704	1.5	Down
18396	C00096	GDP-Mannose	0.00174758	1.8	Down
439258	C02291	L-Cystathionine	0.00187551	1.6	Down
444791	C00191	Glucuronate	0.00192991	2	Down
5958	C00668	alpha-D-Glucose 6-phosphate	0.00193867	2	Down
469	C00956	L-2-Aminoadipate	0.00236675	2	Down
10991489	C00208	Maltose	0.00237036	1.7	Down
448209	C00128	CMP-Sialic acid	0.00240857	1.4	Down
439713	C02348	(R)-Allantoin	0.0030076	1.4	Down
91541	NA	5-hydroxymethyl-2'-deoxyuridine	0.0046907	1.7	Down
12599	C00360	dAMP	0.00539363	1.6	Down
10685	C00955	Tryptophanol	0.00761651	2.3	Down
441484	C00247	L-Sorbose	0.00824821	3.6	Down
65040	C02376	5-Methylcytosine	0.00873133	1.5	Down
53477679	C00029	UDP-glucose	0.00912995	1.3	Down
15047	C02067	Pseudouridine	0.00989584	1.6	Down
6133	C00075	UTP	0.00993374	1.2	Down
5780	C00794	D-Sorbitol	0.0111171	1.5	Down
439211	C00325	GDP-L-fucose	0.0120892	1.6	Down
588	C00791	Creatinine	0.012482	1.3	Down
6262	C00077	L-Ornithine	0.0177479	1.3	Down
9750	C00327	L-Citrulline	0.0199913	1.4	Down
106	C01005	O-Phospho-L-serine	0.0207676	1.7	Down
338	C00805	Salicylic acid	0.0213457	1.5	Down
84571	C00243	Lactose	0.0258003	1.5	Down
6031	C00015	UDP	0.0294728	1.4	Down
7427	C01083	Trehalose	0.0308033	1.2	Down
123831	C03626	N,N-Dimethylarginine	0.0345581	1.5	Down
5460005	C01801	2-Deoxy-D-ribose	0.0359512	1.3	Down
496	C00612	N1-Acetylspermidine	0.0374001	1.2	Down
5957	C00002	ATP	0.0386669	1.4	Down
3845	C01717	Kynurenic acid	0.0410195	1.4	Down
444266	C01384	Maleate	0.0437167	1.4	Down
13391465	NA	Tetrahydrouridine	0.0476589	1.4	Down
1050	C00250	Pyridoxal	0.0477432	1.3	Down
235719	NA	3-Nitro-tyrosine	0.0483312	1.5	Down
13711	C00881	Deoxycytidine	0.0490502	2	Down
5886	C00006	NADP	0.049652	1.3	Down

## Sheet: 12h
PubChem_ID	KEGG_ID	Compound_Name	Condition_A_pvalue	Condition_A_foldchange	Condition_A_foldchange_direction
439176	C00170	5-Methylthioadenosine	6.52e-11	4.1	Up
5962	C00047	L-Lysine	3.12e-09	2	Up
27476	C02494	1-Methyladenosine	1.02e-08	6.4	Up
145742	C00148	L-Proline	1.06e-08	1.6	Up
102175	NA	N6-Methyladenosine	2.2e-08	6.3	Up
16757548	C00019	S-Adenosyl-L-methionine	2.36e-08	3.1	Up
6306	C00407	L-Isoleucine	2.55e-08	1.4	Up
278	C00169	Carbamoyl phosphate	3.01e-08	6.3	Up
439165	C00103	D-Glucose 1-phosphate	3.37e-08	5.8	Up
6322	C00062	L-Arginine	3.9e-08	2.1	Up
7405	C01879	Pyroglutamic acid	1.02e-07	1.3	Up
6106	C00123	L-Leucine	4.38e-07	1.3	Up
6287	C00183	L-Valine	5.86e-07	1.4	Up
5951	C00065	L-Serine	7.6e-07	1.5	Up
6140	C00079	L-Phenylalanine	9.26e-07	1.3	Up
6267	C00152	L-Asparagine	2.39e-06	1.7	Up
863	C00248	Lipoamide	3.11e-06	1.4	Up
6057	C00082	L-Tyrosine	4.18e-06	1.4	Up
1066	C03722	Quinolinic acid	5.83e-06	6.2	Up
190	C00147	Adenine	7.17e-06	3.9	Up
5202	C00780	Serotonin	1.1e-05	1.6	Up
12647	C00263	L-Homoserine	1.66e-05	1.3	Up
5950	C00041	L-Alanine	1.91e-05	1.4	Up
6305	C00078	L-Tryptophan	2.72e-05	1.4	Up
936	C00153	Nicotinamide	4.82e-05	1.4	Up
6288	C00188	L-Threonine	5.16e-05	1.2	Up
6021	C00294	Inosine	6.18e-05	8.2	Up
440122	C03794	Adenylosuccinate	7.97e-05	1.7	Up
96312	NA	6-O-MethylGuanosine	9.39e-05	5.1	Up
5961	C00064	L-Glutamine	0.000128931	1.1	Up
6274	C00135	L-Histidine	0.000146859	1.3	Up
64959	C01762	Xanthosine	0.000163558	2.9	Up
196	C06104	Adipate	0.000229861	1.5	Up
6029	C00299	Uridine	0.000671443	3.9	Up
12046	NA	2-Methylglutaric acid	0.000803323	1.5	Up
96373	C04545	1-Methylguanosine	0.000941588	5.6	Up
16950	C03406	L-Argininosuccinate	0.00100318	1.2	Up
750	C00037	Glycine	0.00136707	1.2	Up
1826	C05635	5-Hydroxyindoleacetate	0.00139736	2.4	Up
10972	NA	N-AcetylGlycine	0.00166625	1.7	Up
60961	C00212	Adenosine	0.00172681	1.9	Up
6802	C00387	Guanosine	0.00235226	3.3	Up
92904	C02043	Indole-3-lactic acid	0.0023968	1.6	Up
700653	NA	N-Acetyl-L-tryptophan	0.00395592	1.9	Up
938	C00253	Nicotinic acid	0.00432126	1.6	Up
6137	C00073	L-Methionine	0.00593832	1.8	Up
161166	C00328	L-Kynurenine	0.00987789	1.3	Up
21863	NA	2-Furoylglycine	0.0109844	1.5	Up
709625	NA	Cinnamoylglycine	0.0134353	1.8	Up
91531	C06196	dIMP	0.0151955	1.3	Up
988	C00864	Pantothenate	0.0197889	1.1	Up
5699	C02470	Xanthurenic acid	0.0200582	1.5	Up
119	C00334	4-Aminobutyric acid	0.0340248	1.1	Up
5862	C00097	L-Cysteine	0.0350359	1.2	Up
6262	C00077	L-Ornithine	0.0367449	1.1	Up
227	C00108	Anthranilate	0.037373	1.7	Up
8742	C00493	Shikimate	0.0390211	1.2	Up
1054	C00314	Pyridoxine	0.0523116	1	No Change
111	C02642	N-Carbamoyl-beta-alanine	0.0528657	1	No Change
10400369	C01094	D-Fructose 1-phosphate	0.0534122	1	No Change
440641	C05345	beta-D-Fructose 6-phosphate	0.0572071	1	No Change
30819	C06501	Phosphotyrosine	0.0574968	1	No Change
7339	C00119	5-Phospho-alpha-D-ribose 1-diphosphate	0.0606474	1	No Change
5789	C00214	Thymidine	0.0609271	1	No Change
444972	C00122	Fumarate	0.0621901	1	No Change
1145	C01104	Trimethylamine N-oxide	0.0691244	1	No Change
8582	C00130	IMP	0.0693852	1	No Change
1014	C00588	Phosphocholine	0.0699098	1	No Change
439194	C00258	Glycerate	0.0732249	1	No Change
107689	C00186	Lactate	0.07827	1	No Change
892	C00137	myo-Inositol	0.0865335	1	No Change
150971	NA	2'-O-methylcytidine	0.0898254	1	No Change
5810	C01157	Hydroxyproline	0.0904441	1	No Change
6131	C00055	CMP	0.0955172	1	No Change
18396	C00096	GDP-Mannose	0.0990559	1	No Change
445408	NA	5-methyluridine	0.100328	1	No Change
6175	C00475	Cytidine	0.109916	1	No Change
6804	C00144	GMP	0.111785	1	No Change
5280498	C02214	Glutaconate	0.111846	1	No Change
338	C00805	Salicylic acid	0.116564	1	No Change
439224	C00386	Carnosine	0.126507	1	No Change
15047	C02067	Pseudouridine	0.128225	1	No Change
6022	C00008	ADP	0.12938	1	No Change
967	C00295	Orotate	0.129532	1	No Change
73318	NA	8-hydroxy-2'-deoxyguanosine	0.129592	1	No Change
441484	C00247	L-Sorbose	0.133062	1	No Change
92258	C04148	Phenylacetylglutamine	0.133284	1	No Change
7427	C01083	Trehalose	0.141436	1	No Change
16500	C00498	ADP-glucose	0.142674	1	No Change
668	C00111	Glycerone phosphate	0.147558	1	No Change
65059	C00362	dGMP	0.148741	1	No Change
10253	C07588	Salicylurate	0.156627	1	No Change
84571	C00243	Lactose	0.157145	1	No Change
439174	C00140	N-acetylglucosamine	0.173914	1	No Change
11361	C02242	7-Methylguanine	0.19492	1	No Change
6083	C00020	AMP	0.202858	1	No Change
1050	C00250	Pyridoxal	0.206017	1	No Change
247	C00719	Betaine	0.210905	1	No Change
91541	NA	5-hydroxymethyl-2'-deoxyuridine	0.213162	1	No Change
1135	C00178	Thymine	0.223079	1	No Change
811	C00490	Itaconate	0.227535	1	No Change
6176	C00063	CTP	0.237122	1	No Change
8583	C00081	ITP	0.250053	1	No Change
1188	C00385	Xanthine	0.252674	1	No Change
22833512	C00005	NADPH	0.256602	1	No Change
317398	C04779	2'-O-methyladenosine	0.266832	1	No Change
132862	C03884	Monomethyl-L-arginine	0.270257	1	No Change
6723	C00847	4-Pyridoxic acid	0.287926	1	No Change
890	C01204	Phytate	0.294257	1	No Change
441187	C06814	D-Xylose-5-phosphate	0.299736	1	No Change
1081	C00815	2-Hydroxy-2-methylbutanedioic acid	0.318277	1	No Change
1052	C00534	Pyridoxamine	0.320185	1	No Change
187790	C00330	DeoxyGuanosine	0.33611	1	No Change
92105	C01152	1-Methylhistidine	0.360915	1	No Change
439278	C00631	D-Glycerate 2-phosphate	0.366302	1	No Change
9750	C00327	L-Citrulline	0.407475	1	No Change
58	C00109	2-Oxobutanoate	0.414241	1	No Change
6076	C00575	cAMP	0.420261	1	No Change
440658	C05402	Melibiose	0.440555	1	No Change
65103	C00286	dGTP	0.453259	1	No Change
186	C00227	Acetyl phosphate	0.461894	1	No Change
763	C00581	Guanidinoacetate	0.465673	1	No Change
70912	C02710	N-Acetyl-L-leucine	0.478855	1	No Change
764	C00242	Guanine	0.49007	1	No Change
8977	C00035	GDP	0.49194	1	No Change
6037	C00504	Folate	0.492102	1	No Change
867	C00383	Malonate	0.496563	1	No Change
1176	C00086	Urea	0.517759	1	No Change
73323	C00655	XMP	0.527177	1	No Change
493570	C00255	Riboflavin	0.535279	1	No Change
928	C00004	NADH	0.538626	1	No Change
1738	C05582	Homovanillate	0.542362	1	No Change
743	C00489	Glutaric Acid	0.556335	1	No Change
13730	C00559	Deoxyadenosine	0.561228	1	No Change
5793	C00031	Glucose	0.573145	1	No Change
790	C00262	Hypoxanthine	0.579274	1	No Change
10267	C05378	beta-D-Fructose 1,6-bisphosphate	0.584842	1	No Change
5957	C00002	ATP	0.623567	1	No Change
13711	C00881	Deoxycytidine	0.631267	1	No Change
724	C00597	D-Glycerate 3-phosphate	0.636242	1	No Change
65058	C05512	Deoxyinosine	0.706024	1	No Change
99558	NA	S-(2-Aminoethyl)-cysteine	0.709704	1	No Change
964	C00168	hydroxypyruvate	0.80341	1	No Change
135	C00156	4-hydroxybenzoate	0.808853	1	No Change
5780	C00794	D-Sorbitol	0.809143	1	No Change
122357	C00279	D-Erythrose 4-phosphate	0.818329	1	No Change
1150	C00398	Tryptamine	0.841552	1	No Change
496	C00612	N1-Acetylspermidine	0.841651	1	No Change
144	C01017	5-Hydroxytryptophan	0.843638	1	No Change
439213	C00329	D-Glucosamine	0.854186	1	No Change
106	C01005	O-Phospho-L-serine	0.857494	1	No Change
729	C00661	D-Glyceraldehyde 3-Phosphate	0.869287	1	No Change
5287531	C16463	3',5'-Cyclic diGMP	0.885587	1	No Change
444266	C01384	Maleate	0.938295	1	No Change
970	C00036	Oxaloacetate	0.971346	1	No Change
65063	C00365	dUMP	0.985363	1	No Change
3382778	C01081	Thiamine monophosphate	0.988298	1	No Change
67678	C00491	L-Cystine	0.9992	1	No Change
487	C02170	Methyl malonate	3.36e-11	3.2	Down
1110	C00042	Succinate	6.87e-11	3.1	Down
1130	C00378	Thiamine	1.64e-10	2	Down
439155	C00021	S-Adenosyl-L-homocysteine	1.94e-10	7.8	Down
124886	C00051	Reduced glutathione	4.2e-10	257.9	Down
975	C00127	Oxidized glutathione	7.87e-10	9.4	Down
13945	C00239	dCMP	2.47e-08	81.8	Down
896	C01598	Melatonin	3e-08	22.6	Down
5459822	C01205	(R)-3-Aminoisobutyrate	1.58e-07	1.6	Down
2724480	C00318	Carnitine	1.61e-07	2.1	Down
500	C01035	4-Guanidinobutyric acid	1.7e-07	1.6	Down
80283	C02356	(S)-2-Aminobutanoic acid	4.29e-07	1.6	Down
439162	C00093	Glycerol-3-Phosphate	5.53e-07	1.7	Down
5960	C00049	L-Aspartate	6.36e-07	1.7	Down
588	C00791	Creatinine	1.13e-06	2	Down
305	C00114	Choline	1.68e-06	1.6	Down
587	C02305	Creatine phosphate	2.73e-06	2.4	Down
5893	C00003	NAD	9.33e-06	1.3	Down
17473	C00167	UDP-glucuronate	1.24e-05	1.6	Down
311	C00158	Citrate	1.56e-05	1.8	Down
1005	C00074	Phosphoenolpyruvate	3.2e-05	1.9	Down
65040	C02376	5-Methylcytosine	3.7e-05	1.5	Down
445675	C00043	UDP-N-acetyl-D-glucosamine	0.000119758	1.5	Down
13391465	NA	Tetrahydrouridine	0.000169453	2.2	Down
586	C00300	Creatine	0.000233399	1.3	Down
5460005	C01801	2-Deoxy-D-ribose	0.000258488	2.4	Down
22833559	C00281	Sedoheptulose 7-phosphate	0.000286963	1.9	Down
86	C00632	3-Hydroxyanthranilate	0.000302335	1.2	Down
6031	C00015	UDP	0.00034879	1.4	Down
643757	C00417	cis-Aconitate	0.000513065	2.8	Down
76406	C01073	N-Acetyl-beta-alanine	0.000533171	1.3	Down
6030	C00105	UMP	0.000581629	1.3	Down
469	C00956	L-2-Aminoadipate	0.000640428	1.6	Down
1175	C00366	Uric acid	0.000686415	1.6	Down
439258	C02291	L-Cystathionine	0.00109796	1.8	Down
123831	C03626	N,N-Dimethylarginine	0.001109	1.6	Down
12599	C00360	dAMP	0.00139667	1.4	Down
33032	C00025	L-Glutamate	0.00147663	1.1	Down
9700	C00364	dTMP	0.00148731	1.3	Down
51	C00026	2-Oxoglutarate	0.00179516	1.6	Down
439713	C02348	(R)-Allantoin	0.00227595	1.4	Down
235719	NA	3-Nitro-tyrosine	0.00238748	1.7	Down
643975	C00016	FAD	0.00244079	1.3	Down
1174	C00106	Uracil	0.00248519	1.4	Down
683	C00236	3-Phospho-D-glyceroyl phosphate	0.00274307	1.6	Down
5886	C00006	NADP	0.00320181	1.3	Down
5816	C00788	(R)-(-)-Epinephrine	0.0033087	1.1	Down
10685	C00955	Tryptophanol	0.00357664	3.3	Down
448209	C00128	CMP-Sialic acid	0.00371057	1.3	Down
439211	C00325	GDP-L-fucose	0.00489416	1.9	Down
146302	C01345	dITP	0.00632734	2.1	Down
5958	C00668	alpha-D-Glucose 6-phosphate	0.00684937	1.2	Down
1060	C00022	Pyruvate	0.00715004	2	Down
188324	C01112	D-Arabinose 5-phosphate	0.00803238	1.5	Down
439220	C00361	dGDP	0.00864216	1.5	Down
439167	C00117	Ribose 5-Phosphate	0.0117963	1.4	Down
440996	C00357	N-Acetyl-D-glucosamine 6-phosphate	0.0118757	1.5	Down
1123	C00245	Taurine	0.0119111	1.5	Down
107461	NA	N4-acetylcytidine	0.0120757	1.3	Down
10991489	C00208	Maltose	0.0148421	1.6	Down
17513	C04663	5-Aminoimidazole-4-carboxamide riboside	0.0174325	1.3	Down
53477679	C00029	UDP-glucose	0.018591	1.4	Down
13279	C03592	5-methyl-2'-deoxycytidine	0.019388	1.5	Down
444791	C00191	Glucuronate	0.0207494	1.6	Down
6857396	NA	Sialate	0.0211431	2.1	Down
449	C00418	Mevalonate	0.0217402	2.3	Down
3614	C05127	1-Methylhistamine	0.0217479	1.4	Down
6133	C00075	UTP	0.0242492	1.3	Down
11158091	C20565	Cyclic di-AMP	0.0260463	1.9	Down
24758425	C01780	Aldosterone	0.0328568	1.4	Down
3845	C01717	Kynurenic acid	0.0400113	1.9	Down
6947	C01988	O-Nitrophenol	0.0426284	1.4	Down
222656	C00149	L-Malate	0.0432597	1.1	Down
6830	C00044	GTP	0.0489892	2	Down

## Sheet: 24h
PubChem_ID	KEGG_ID	Compound_Name	Condition_A_pvalue	Condition_A_foldchange	Condition_A_foldchange_direction
439176	C00170	5-Methylthioadenosine	5.66e-09	5.3	Up
6267	C00152	L-Asparagine	1.38e-08	3.7	Up
145742	C00148	L-Proline	2.07e-08	1.9	Up
33032	C00025	L-Glutamate	2.12e-08	1.5	Up
16757548	C00019	S-Adenosyl-L-methionine	2.14e-08	4.3	Up
5961	C00064	L-Glutamine	1.51e-07	1.7	Up
12647	C00263	L-Homoserine	7.23e-07	2	Up
6288	C00188	L-Threonine	8.16e-07	2	Up
6262	C00077	L-Ornithine	1.13e-06	2.5	Up
5202	C00780	Serotonin	2.01e-06	3.2	Up
936	C00153	Nicotinamide	2.12e-06	2.3	Up
5780	C00794	D-Sorbitol	2.15e-06	2.8	Up
1054	C00314	Pyridoxine	3.82e-06	1.7	Up
6140	C00079	L-Phenylalanine	4.29e-06	2.1	Up
763	C00581	Guanidinoacetate	5.49e-06	2.1	Up
5950	C00041	L-Alanine	5.61e-06	2.5	Up
5699	C02470	Xanthurenic acid	5.84e-06	2.5	Up
863	C00248	Lipoamide	6.87e-06	2.2	Up
7405	C01879	Pyroglutamic acid	6.92e-06	2	Up
6306	C00407	L-Isoleucine	7.07e-06	2	Up
6106	C00123	L-Leucine	7.84e-06	2	Up
6287	C00183	L-Valine	8.11e-06	2	Up
750	C00037	Glycine	1.64e-05	1.9	Up
5962	C00047	L-Lysine	2.19e-05	2.9	Up
5951	C00065	L-Serine	2.44e-05	2.2	Up
5810	C01157	Hydroxyproline	2.57e-05	1.8	Up
6133	C00075	UTP	3.27e-05	2.1	Up
6322	C00062	L-Arginine	5e-05	3.1	Up
811	C00490	Itaconate	5.53e-05	1.6	Up
5862	C00097	L-Cysteine	8.84e-05	2.1	Up
196	C06104	Adipate	0.000102978	2.3	Up
111	C02642	N-Carbamoyl-beta-alanine	0.000109935	2.3	Up
1081	C00815	2-Hydroxy-2-methylbutanedioic acid	0.000127718	2.1	Up
6305	C00078	L-Tryptophan	0.000141574	2.2	Up
867	C00383	Malonate	0.000144151	1.4	Up
65103	C00286	dGTP	0.000152781	1.8	Up
21863	NA	2-Furoylglycine	0.000165417	2.1	Up
6274	C00135	L-Histidine	0.000200534	1.7	Up
6723	C00847	4-Pyridoxic acid	0.000210303	1.3	Up
5793	C00031	Glucose	0.00026464	2.1	Up
6057	C00082	L-Tyrosine	0.000299291	2.6	Up
305	C00114	Choline	0.000350131	1.3	Up
92258	C04148	Phenylacetylglutamine	0.000356418	2	Up
99558	NA	S-(2-Aminoethyl)-cysteine	0.000397429	1.8	Up
16950	C03406	L-Argininosuccinate	0.000407777	2.6	Up
12046	NA	2-Methylglutaric acid	0.000446609	2	Up
64959	C01762	Xanthosine	0.000482279	2.7	Up
6031	C00015	UDP	0.000509042	1.6	Up
938	C00253	Nicotinic acid	0.000519649	2.2	Up
743	C00489	Glutaric Acid	0.000551098	1.6	Up
80283	C02356	(S)-2-Aminobutanoic acid	0.00057607	1.3	Up
161166	C00328	L-Kynurenine	0.000588188	2.2	Up
964	C00168	hydroxypyruvate	0.000611269	1.6	Up
8977	C00035	GDP	0.000635108	1.4	Up
1110	C00042	Succinate	0.000710044	2.3	Up
487	C02170	Methyl malonate	0.000964794	2.3	Up
5280498	C02214	Glutaconate	0.00101345	1.9	Up
790	C00262	Hypoxanthine	0.00112395	2.1	Up
440122	C03794	Adenylosuccinate	0.0012045	2	Up
22833559	C00281	Sedoheptulose 7-phosphate	0.00146984	1.7	Up
6022	C00008	ADP	0.00150424	1.8	Up
439194	C00258	Glycerate	0.00156824	2.3	Up
5893	C00003	NAD	0.0016964	1.3	Up
439213	C00329	D-Glucosamine	0.00177009	2	Up
445675	C00043	UDP-N-acetyl-D-glucosamine	0.00191495	1.8	Up
496	C00612	N1-Acetylspermidine	0.00197132	1.6	Up
1066	C03722	Quinolinic acid	0.00208395	7.6	Up
7427	C01083	Trehalose	0.0021444	1.4	Up
6175	C00475	Cytidine	0.00225608	1.7	Up
6176	C00063	CTP	0.00228465	1.6	Up
988	C00864	Pantothenate	0.00323086	1.4	Up
13730	C00559	Deoxyadenosine	0.0032921	2.2	Up
6131	C00055	CMP	0.00354427	1.4	Up
709625	NA	Cinnamoylglycine	0.00374616	2.9	Up
8583	C00081	ITP	0.00434439	1.8	Up
1826	C05635	5-Hydroxyindoleacetate	0.00436055	2.5	Up
1014	C00588	Phosphocholine	0.00444155	1.4	Up
441484	C00247	L-Sorbose	0.00466173	2.9	Up
247	C00719	Betaine	0.00468527	1.9	Up
5459822	C01205	(R)-3-Aminoisobutyrate	0.00540749	1.2	Up
9750	C00327	L-Citrulline	0.00579723	1.8	Up
30819	C06501	Phosphotyrosine	0.0065739	1.9	Up
439220	C00361	dGDP	0.00670742	1.4	Up
493570	C00255	Riboflavin	0.00961793	1.8	Up
1135	C00178	Thymine	0.00987521	1.7	Up
6137	C00073	L-Methionine	0.0100913	3.7	Up
65059	C00362	dGMP	0.0110705	1.4	Up
84571	C00243	Lactose	0.0114702	1.5	Up
227	C00108	Anthranilate	0.0115667	2	Up
1052	C00534	Pyridoxamine	0.0118549	2.6	Up
92105	C01152	1-Methylhistidine	0.0124274	1.6	Up
10267	C05378	beta-D-Fructose 1,6-bisphosphate	0.0127299	1.7	Up
190	C00147	Adenine	0.012815	1.3	Up
444266	C01384	Maleate	0.0133627	1.8	Up
6030	C00105	UMP	0.0136764	1.5	Up
10991489	C00208	Maltose	0.0141163	1.5	Up
444972	C00122	Fumarate	0.0162503	2.3	Up
119	C00334	4-Aminobutyric acid	0.0166684	1.8	Up
186	C00227	Acetyl phosphate	0.0167724	2.5	Up
107689	C00186	Lactate	0.0172314	6.8	Up
5958	C00668	alpha-D-Glucose 6-phosphate	0.0180742	1.6	Up
11361	C02242	7-Methylguanine	0.0180765	2	Up
278	C00169	Carbamoyl phosphate	0.0215408	10.3	Up
70912	C02710	N-Acetyl-L-leucine	0.0216627	1.8	Up
51	C00026	2-Oxoglutarate	0.0218501	2.4	Up
53477679	C00029	UDP-glucose	0.0224745	1.3	Up
1145	C01104	Trimethylamine N-oxide	0.0237269	2	Up
8582	C00130	IMP	0.0240826	1.4	Up
970	C00036	Oxaloacetate	0.0250072	1.4	Up
1060	C00022	Pyruvate	0.0250272	2.2	Up
439278	C00631	D-Glycerate 2-phosphate	0.0285531	1.9	Up
65063	C00365	dUMP	0.0288545	1.5	Up
91531	C06196	dIMP	0.0302844	1.7	Up
73323	C00655	XMP	0.0312143	2.8	Up
92904	C02043	Indole-3-lactic acid	0.0336149	1.5	Up
24758425	C01780	Aldosterone	0.0337498	1.4	Up
440641	C05345	beta-D-Fructose 6-phosphate	0.0354181	1.4	Up
439713	C02348	(R)-Allantoin	0.0361678	1.5	Up
1005	C00074	Phosphoenolpyruvate	0.0368707	1.8	Up
12599	C00360	dAMP	0.0370956	1.3	Up
10253	C07588	Salicylurate	0.0391891	1.5	Up
643757	C00417	cis-Aconitate	0.0407518	2	Up
1738	C05582	Homovanillate	0.0431859	2	Up
10400369	C01094	D-Fructose 1-phosphate	0.0450722	1.4	Up
448209	C00128	CMP-Sialic acid	0.0499407	1.3	Up
500	C01035	4-Guanidinobutyric acid	0.0514289	1	No Change
1176	C00086	Urea	0.0515477	1	No Change
928	C00004	NADH	0.0522308	1	No Change
10972	NA	N-AcetylGlycine	0.0547697	1	No Change
683	C00236	3-Phospho-D-glyceroyl phosphate	0.0560591	1	No Change
73318	NA	8-hydroxy-2'-deoxyguanosine	0.0561571	1	No Change
6083	C00020	AMP	0.0637369	1	No Change
8742	C00493	Shikimate	0.0687668	1	No Change
235719	NA	3-Nitro-tyrosine	0.0715537	1	No Change
5287531	C16463	3',5'-Cyclic diGMP	0.076118	1	No Change
724	C00597	D-Glycerate 3-phosphate	0.0798181	1	No Change
144	C01017	5-Hydroxytryptophan	0.0803993	1	No Change
15047	C02067	Pseudouridine	0.0820141	1	No Change
439224	C00386	Carnosine	0.104625	1	No Change
122357	C00279	D-Erythrose 4-phosphate	0.119806	1	No Change
27476	C02494	1-Methyladenosine	0.125904	1	No Change
6802	C00387	Guanosine	0.137131	1	No Change
643975	C00016	FAD	0.139422	1	No Change
1130	C00378	Thiamine	0.140636	1	No Change
5886	C00006	NADP	0.141894	1	No Change
17473	C00167	UDP-glucuronate	0.143552	1	No Change
58	C00109	2-Oxobutanoate	0.143907	1	No Change
6037	C00504	Folate	0.147346	1	No Change
3382778	C01081	Thiamine monophosphate	0.148322	1	No Change
6804	C00144	GMP	0.150321	1	No Change
222656	C00149	L-Malate	0.15292	1	No Change
96373	C04545	1-Methylguanosine	0.156711	1	No Change
1188	C00385	Xanthine	0.162995	1	No Change
135	C00156	4-hydroxybenzoate	0.163565	1	No Change
7339	C00119	5-Phospho-alpha-D-ribose 1-diphosphate	0.164404	1	No Change
10685	C00955	Tryptophanol	0.17236	1	No Change
1174	C00106	Uracil	0.176309	1	No Change
102175	NA	N6-Methyladenosine	0.177617	1	No Change
439174	C00140	N-acetylglucosamine	0.186702	1	No Change
729	C00661	D-Glyceraldehyde 3-Phosphate	0.212209	1	No Change
439162	C00093	Glycerol-3-Phosphate	0.214455	1	No Change
441187	C06814	D-Xylose-5-phosphate	0.221613	1	No Change
106	C01005	O-Phospho-L-serine	0.237251	1	No Change
6021	C00294	Inosine	0.241648	1	No Change
668	C00111	Glycerone phosphate	0.243809	1	No Change
764	C00242	Guanine	0.246377	1	No Change
449	C00418	Mevalonate	0.253086	1	No Change
107461	NA	N4-acetylcytidine	0.254636	1	No Change
439165	C00103	D-Glucose 1-phosphate	0.258644	1	No Change
967	C00295	Orotate	0.25957	1	No Change
6029	C00299	Uridine	0.261154	1	No Change
445408	NA	5-methyluridine	0.263652	1	No Change
890	C01204	Phytate	0.266114	1	No Change
700653	NA	N-Acetyl-L-tryptophan	0.311206	1	No Change
16500	C00498	ADP-glucose	0.316145	1	No Change
5960	C00049	L-Aspartate	0.327171	1	No Change
338	C00805	Salicylic acid	0.351861	1	No Change
17513	C04663	5-Aminoimidazole-4-carboxamide riboside	0.361746	1	No Change
588	C00791	Creatinine	0.380744	1	No Change
11158091	C20565	Cyclic di-AMP	0.382645	1	No Change
439167	C00117	Ribose 5-Phosphate	0.385539	1	No Change
440658	C05402	Melibiose	0.388006	1	No Change
317398	C04779	2'-O-methyladenosine	0.398313	1	No Change
13279	C03592	5-methyl-2'-deoxycytidine	0.402328	1	No Change
9700	C00364	dTMP	0.435213	1	No Change
439211	C00325	GDP-L-fucose	0.437556	1	No Change
896	C01598	Melatonin	0.47747	1	No Change
3845	C01717	Kynurenic acid	0.484674	1	No Change
1123	C00245	Taurine	0.485717	1	No Change
1175	C00366	Uric acid	0.494066	1	No Change
22833512	C00005	NADPH	0.499707	1	No Change
311	C00158	Citrate	0.535058	1	No Change
5957	C00002	ATP	0.539402	1	No Change
6076	C00575	cAMP	0.548543	1	No Change
65040	C02376	5-Methylcytosine	0.564822	1	No Change
444791	C00191	Glucuronate	0.570335	1	No Change
123831	C03626	N,N-Dimethylarginine	0.586235	1	No Change
188324	C01112	D-Arabinose 5-phosphate	0.588406	1	No Change
586	C00300	Creatine	0.594097	1	No Change
150971	NA	2'-O-methylcytidine	0.613731	1	No Change
60961	C00212	Adenosine	0.650056	1	No Change
86	C00632	3-Hydroxyanthranilate	0.656469	1	No Change
76406	C01073	N-Acetyl-beta-alanine	0.667162	1	No Change
146302	C01345	dITP	0.675779	1	No Change
132862	C03884	Monomethyl-L-arginine	0.752026	1	No Change
1150	C00398	Tryptamine	0.758738	1	No Change
5460005	C01801	2-Deoxy-D-ribose	0.761519	1	No Change
18396	C00096	GDP-Mannose	0.76822	1	No Change
187790	C00330	DeoxyGuanosine	0.784915	1	No Change
1050	C00250	Pyridoxal	0.824976	1	No Change
6947	C01988	O-Nitrophenol	0.833092	1	No Change
6830	C00044	GTP	0.850821	1	No Change
440996	C00357	N-Acetyl-D-glucosamine 6-phosphate	0.87949	1	No Change
13391465	NA	Tetrahydrouridine	0.887638	1	No Change
587	C02305	Creatine phosphate	0.893982	1	No Change
5816	C00788	(R)-(-)-Epinephrine	0.912714	1	No Change
91541	NA	5-hydroxymethyl-2'-deoxyuridine	0.994923	1	No Change
3614	C05127	1-Methylhistamine	0.995468	1	No Change
124886	C00051	Reduced glutathione	1.57e-10	81.5	Down
13945	C00239	dCMP	9.02e-10	38.5	Down
975	C00127	Oxidized glutathione	5.53e-08	4.8	Down
439155	C00021	S-Adenosyl-L-homocysteine	3.37e-07	4.9	Down
439258	C02291	L-Cystathionine	3.84e-05	1.8	Down
469	C00956	L-2-Aminoadipate	0.000563794	1.7	Down
6857396	NA	Sialate	0.0156877	1.7	Down
2724480	C00318	Carnitine	0.0160776	1.6	Down
892	C00137	myo-Inositol	0.0167919	1.2	Down

## Sheet: 48h
PubChem_ID	KEGG_ID	Compound_Name	Condition_A_pvalue	Condition_A_foldchange	Condition_A_foldchange_direction
5961	C00064	L-Glutamine	5.36e-13	3.2	Up
33032	C00025	L-Glutamate	5.98e-12	2.8	Up
5951	C00065	L-Serine	1.71e-10	4.2	Up
439176	C00170	5-Methylthioadenosine	9.95e-10	5.5	Up
7405	C01879	Pyroglutamic acid	1.06e-09	3.4	Up
196	C06104	Adipate	1.39e-08	3.5	Up
12046	NA	2-Methylglutaric acid	1.54e-08	3.5	Up
493570	C00255	Riboflavin	1.57e-08	3.7	Up
867	C00383	Malonate	2.62e-08	3	Up
6106	C00123	L-Leucine	3.43e-08	2.6	Up
6306	C00407	L-Isoleucine	3.82e-08	2.5	Up
111	C02642	N-Carbamoyl-beta-alanine	4.62e-08	3.4	Up
6288	C00188	L-Threonine	6.7e-08	2.3	Up
145742	C00148	L-Proline	1.83e-07	2.2	Up
763	C00581	Guanidinoacetate	1.88e-07	2.3	Up
7427	C01083	Trehalose	2.58e-07	2.4	Up
12647	C00263	L-Homoserine	2.74e-07	2.3	Up
6322	C00062	L-Arginine	2.89e-07	2.6	Up
964	C00168	hydroxypyruvate	3.59e-07	3	Up
6287	C00183	L-Valine	3.86e-07	2.3	Up
790	C00262	Hypoxanthine	4.41e-07	5.4	Up
278	C00169	Carbamoyl phosphate	5.72e-07	53.3	Up
1066	C03722	Quinolinic acid	8.47e-07	16.6	Up
6267	C00152	L-Asparagine	9.89e-07	10.5	Up
6176	C00063	CTP	1.19e-06	2.8	Up
5962	C00047	L-Lysine	1.48e-06	2.9	Up
15047	C02067	Pseudouridine	1.58e-06	2.2	Up
6140	C00079	L-Phenylalanine	1.67e-06	2.4	Up
1054	C00314	Pyridoxine	2.5e-06	3.2	Up
247	C00719	Betaine	2.5e-06	4.4	Up
30819	C06501	Phosphotyrosine	3.41e-06	8.7	Up
119	C00334	4-Aminobutyric acid	4.53e-06	2.9	Up
150971	NA	2'-O-methylcytidine	4.65e-06	14.5	Up
99558	NA	S-(2-Aminoethyl)-cysteine	9.43e-06	3.2	Up
5202	C00780	Serotonin	1.08e-05	10.1	Up
6262	C00077	L-Ornithine	1.14e-05	3.5	Up
8583	C00081	ITP	1.37e-05	2.7	Up
6057	C00082	L-Tyrosine	1.41e-05	2.4	Up
5862	C00097	L-Cysteine	1.57e-05	2	Up
5780	C00794	D-Sorbitol	2.44e-05	6.8	Up
6131	C00055	CMP	2.47e-05	1.8	Up
6137	C00073	L-Methionine	2.48e-05	4.4	Up
6274	C00135	L-Histidine	2.48e-05	2.3	Up
135	C00156	4-hydroxybenzoate	2.73e-05	2.7	Up
440122	C03794	Adenylosuccinate	2.94e-05	10	Up
1081	C00815	2-Hydroxy-2-methylbutanedioic acid	3.57e-05	2.7	Up
235719	NA	3-Nitro-tyrosine	3.9e-05	2.6	Up
6133	C00075	UTP	4.04e-05	3.1	Up
439194	C00258	Glycerate	4.23e-05	5.1	Up
16757548	C00019	S-Adenosyl-L-methionine	4.7e-05	2.9	Up
188324	C01112	D-Arabinose 5-phosphate	4.78e-05	3.1	Up
500	C01035	4-Guanidinobutyric acid	5.34e-05	2.9	Up
743	C00489	Glutaric Acid	5.69e-05	2.6	Up
3614	C05127	1-Methylhistamine	5.84e-05	2.4	Up
444791	C00191	Glucuronate	6.97e-05	2.7	Up
970	C00036	Oxaloacetate	7.2e-05	2	Up
10267	C05378	beta-D-Fructose 1,6-bisphosphate	7.69e-05	3.1	Up
724	C00597	D-Glycerate 3-phosphate	8.02e-05	2.5	Up
5699	C02470	Xanthurenic acid	8.16e-05	2.1	Up
6031	C00015	UDP	8.29e-05	1.8	Up
1123	C00245	Taurine	8.57e-05	2.7	Up
6030	C00105	UMP	8.95e-05	1.8	Up
5957	C00002	ATP	9.05e-05	3	Up
5280498	C02214	Glutaconate	9.75e-05	3.1	Up
6947	C01988	O-Nitrophenol	0.000107971	3.8	Up
65103	C00286	dGTP	0.000154354	2.5	Up
13279	C03592	5-methyl-2'-deoxycytidine	0.000176932	2.6	Up
338	C00805	Salicylic acid	0.000205792	2.8	Up
1135	C00178	Thymine	0.000205985	2.7	Up
91531	C06196	dIMP	0.000213978	3	Up
811	C00490	Itaconate	0.000224111	2.7	Up
64959	C01762	Xanthosine	0.000230575	4	Up
988	C00864	Pantothenate	0.000249947	1.7	Up
6723	C00847	4-Pyridoxic acid	0.00026996	2.2	Up
8977	C00035	GDP	0.00029623	1.9	Up
73318	NA	8-hydroxy-2'-deoxyguanosine	0.000349377	3.8	Up
1014	C00588	Phosphocholine	0.000374205	2.4	Up
6305	C00078	L-Tryptophan	0.000374247	1.9	Up
863	C00248	Lipoamide	0.0003805	1.9	Up
53477679	C00029	UDP-glucose	0.00040115	2.1	Up
6022	C00008	ADP	0.000447321	2.4	Up
58	C00109	2-Oxobutanoate	0.000517365	2	Up
439211	C00325	GDP-L-fucose	0.000551482	1.7	Up
936	C00153	Nicotinamide	0.000571532	1.9	Up
938	C00253	Nicotinic acid	0.000582883	2	Up
311	C00158	Citrate	0.000631707	1.7	Up
709625	NA	Cinnamoylglycine	0.000664857	6.1	Up
10253	C07588	Salicylurate	0.000732818	2.8	Up
305	C00114	Choline	0.000741382	1.5	Up
187790	C00330	DeoxyGuanosine	0.000754941	2.5	Up
5459822	C01205	(R)-3-Aminoisobutyrate	0.00081309	1.6	Up
91541	NA	5-hydroxymethyl-2'-deoxyuridine	0.000895435	2.5	Up
1176	C00086	Urea	0.000986681	1.8	Up
16500	C00498	ADP-glucose	0.00123129	1.9	Up
102175	NA	N6-Methyladenosine	0.0014145	38.9	Up
444972	C00122	Fumarate	0.0014167	2.5	Up
1738	C05582	Homovanillate	0.0015146	4.8	Up
27476	C02494	1-Methyladenosine	0.00152078	48.5	Up
161166	C00328	L-Kynurenine	0.00175481	1.6	Up
496	C00612	N1-Acetylspermidine	0.00194575	2.7	Up
5793	C00031	Glucose	0.00207313	3.7	Up
5810	C01157	Hydroxyproline	0.00226568	1.7	Up
1175	C00366	Uric acid	0.00232477	1.4	Up
1188	C00385	Xanthine	0.00235801	2.9	Up
668	C00111	Glycerone phosphate	0.00239144	1.7	Up
444266	C01384	Maleate	0.00239604	2.7	Up
21863	NA	2-Furoylglycine	0.00240009	1.8	Up
439213	C00329	D-Glucosamine	0.00285183	5.1	Up
448209	C00128	CMP-Sialic acid	0.00292739	1.7	Up
3845	C01717	Kynurenic acid	0.00343595	3	Up
96373	C04545	1-Methylguanosine	0.00359603	19.3	Up
186	C00227	Acetyl phosphate	0.00394794	2.2	Up
729	C00661	D-Glyceraldehyde 3-Phosphate	0.00414148	16	Up
80283	C02356	(S)-2-Aminobutanoic acid	0.00424896	1.6	Up
1050	C00250	Pyridoxal	0.00433361	1.6	Up
928	C00004	NADH	0.0045677	1.6	Up
439167	C00117	Ribose 5-Phosphate	0.00468715	2.6	Up
22833512	C00005	NADPH	0.00478798	1.7	Up
10972	NA	N-AcetylGlycine	0.0048848	1.6	Up
96312	NA	6-O-MethylGuanosine	0.0052767	19	Up
1145	C01104	Trimethylamine N-oxide	0.00533391	2.4	Up
439162	C00093	Glycerol-3-Phosphate	0.00538339	6.4	Up
317398	C04779	2'-O-methyladenosine	0.00539551	2.8	Up
65058	C05512	Deoxyinosine	0.00585428	1.8	Up
92904	C02043	Indole-3-lactic acid	0.00621306	2	Up
12599	C00360	dAMP	0.00642269	1.3	Up
439174	C00140	N-acetylglucosamine	0.00650652	1.5	Up
6029	C00299	Uridine	0.00653706	6.5	Up
5816	C00788	(R)-(-)-Epinephrine	0.00701473	1.8	Up
750	C00037	Glycine	0.00705846	1.8	Up
92258	C04148	Phenylacetylglutamine	0.00771748	1.7	Up
122357	C00279	D-Erythrose 4-phosphate	0.00775036	2.2	Up
5893	C00003	NAD	0.00904006	1.4	Up
7339	C00119	5-Phospho-alpha-D-ribose 1-diphosphate	0.00947602	2.9	Up
227	C00108	Anthranilate	0.0100368	2.3	Up
13730	C00559	Deoxyadenosine	0.0110422	2.5	Up
65059	C00362	dGMP	0.0115423	1.6	Up
441187	C06814	D-Xylose-5-phosphate	0.0122561	2.4	Up
5958	C00668	alpha-D-Glucose 6-phosphate	0.0124532	2.6	Up
73323	C00655	XMP	0.0147219	2.2	Up
439278	C00631	D-Glycerate 2-phosphate	0.0155414	1.7	Up
440641	C05345	beta-D-Fructose 6-phosphate	0.0168114	2.2	Up
439224	C00386	Carnosine	0.0182563	2	Up
1052	C00534	Pyridoxamine	0.0185867	2.7	Up
6175	C00475	Cytidine	0.0185896	1.7	Up
84571	C00243	Lactose	0.0185995	1.6	Up
1826	C05635	5-Hydroxyindoleacetate	0.0201441	2.1	Up
439713	C02348	(R)-Allantoin	0.0208104	1.5	Up
6802	C00387	Guanosine	0.0235061	2.3	Up
144	C01017	5-Hydroxytryptophan	0.0248366	1.8	Up
6037	C00504	Folate	0.0268214	2.7	Up
16950	C03406	L-Argininosuccinate	0.0301924	1.6	Up
5950	C00041	L-Alanine	0.0347161	1.5	Up
6830	C00044	GTP	0.0353011	2	Up
3382778	C01081	Thiamine monophosphate	0.0358056	3.5	Up
441484	C00247	L-Sorbose	0.0363925	4.1	Up
107689	C00186	Lactate	0.0407838	2	Up
487	C02170	Methyl malonate	0.0414793	13.8	Up
1110	C00042	Succinate	0.0415255	14.1	Up
70912	C02710	N-Acetyl-L-leucine	0.0436527	2.2	Up
10991489	C00208	Maltose	0.0498527	1.9	Up
13711	C00881	Deoxycytidine	0.050167	1	No Change
445675	C00043	UDP-N-acetyl-D-glucosamine	0.0593114	1	No Change
9750	C00327	L-Citrulline	0.0623754	1	No Change
65063	C00365	dUMP	0.082952	1	No Change
440658	C05402	Melibiose	0.0833099	1	No Change
11361	C02242	7-Methylguanine	0.0936229	1	No Change
6083	C00020	AMP	0.095318	1	No Change
439220	C00361	dGDP	0.0953467	1	No Change
1174	C00106	Uracil	0.10291	1	No Change
1130	C00378	Thiamine	0.110116	1	No Change
9700	C00364	dTMP	0.112382	1	No Change
10685	C00955	Tryptophanol	0.117084	1	No Change
8742	C00493	Shikimate	0.120663	1	No Change
8582	C00130	IMP	0.125269	1	No Change
5789	C00214	Thymidine	0.128225	1	No Change
132862	C03884	Monomethyl-L-arginine	0.130356	1	No Change
6804	C00144	GMP	0.14914	1	No Change
643757	C00417	cis-Aconitate	0.15833	1	No Change
643975	C00016	FAD	0.162156	1	No Change
683	C00236	3-Phospho-D-glyceroyl phosphate	0.176979	1	No Change
17473	C00167	UDP-glucuronate	0.178207	1	No Change
6021	C00294	Inosine	0.18228	1	No Change
51	C00026	2-Oxoglutarate	0.183327	1	No Change
439165	C00103	D-Glucose 1-phosphate	0.190196	1	No Change
222656	C00149	L-Malate	0.196046	1	No Change
967	C00295	Orotate	0.209955	1	No Change
22833559	C00281	Sedoheptulose 7-phosphate	0.221793	1	No Change
86	C00632	3-Hydroxyanthranilate	0.240914	1	No Change
60961	C00212	Adenosine	0.276454	1	No Change
587	C02305	Creatine phosphate	0.282621	1	No Change
10400369	C01094	D-Fructose 1-phosphate	0.310097	1	No Change
1005	C00074	Phosphoenolpyruvate	0.313567	1	No Change
24758425	C01780	Aldosterone	0.317742	1	No Change
76406	C01073	N-Acetyl-beta-alanine	0.333634	1	No Change
107461	NA	N4-acetylcytidine	0.372248	1	No Change
92105	C01152	1-Methylhistidine	0.391989	1	No Change
5886	C00006	NADP	0.4524	1	No Change
106	C01005	O-Phospho-L-serine	0.476313	1	No Change
449	C00418	Mevalonate	0.519923	1	No Change
890	C01204	Phytate	0.548055	1	No Change
469	C00956	L-2-Aminoadipate	0.589983	1	No Change
190	C00147	Adenine	0.639318	1	No Change
18396	C00096	GDP-Mannose	0.697528	1	No Change
65040	C02376	5-Methylcytosine	0.715707	1	No Change
1150	C00398	Tryptamine	0.718489	1	No Change
440996	C00357	N-Acetyl-D-glucosamine 6-phosphate	0.719354	1	No Change
123831	C03626	N,N-Dimethylarginine	0.75703	1	No Change
445408	NA	5-methyluridine	0.7956	1	No Change
586	C00300	Creatine	0.801013	1	No Change
11158091	C20565	Cyclic di-AMP	0.807444	1	No Change
1060	C00022	Pyruvate	0.87336	1	No Change
146302	C01345	dITP	0.91698	1	No Change
764	C00242	Guanine	0.95218	1	No Change
17513	C04663	5-Aminoimidazole-4-carboxamide riboside	0.956792	1	No Change
124886	C00051	Reduced glutathione	3.52e-11	74.4	Down
13945	C00239	dCMP	1.08e-10	57.9	Down
2724480	C00318	Carnitine	8.73e-10	3.8	Down
439155	C00021	S-Adenosyl-L-homocysteine	1.23e-07	7.2	Down
439258	C02291	L-Cystathionine	4.2e-07	4.2	Down
892	C00137	myo-Inositol	7.18e-05	3.1	Down
13391465	NA	Tetrahydrouridine	0.000121179	2.4	Down
6857396	NA	Sialate	0.000212067	2.9	Down
975	C00127	Oxidized glutathione	0.000314724	5.6	Down
896	C01598	Melatonin	0.000578005	1.9	Down
700653	NA	N-Acetyl-L-tryptophan	0.0039654	2.5	Down
5960	C00049	L-Aspartate	0.00421944	2.2	Down
588	C00791	Creatinine	0.0149653	1.4	Down
5460005	C01801	2-Deoxy-D-ribose	0.0207932	2.8	Down
