# Supplementary material for: MS-Based Metabolomics Reveals Metabolic Dysregulation in Erastin-Induced Gastric Adenocarcinoma Cells
Source: Research Square preprint supplement (doi:10.21203/rs.3.rs-927028/v1), 2021-09-30
Supplement: Supplementary file 4 [file 7bdf9cbde3cbe06712cfdc4f.xlsx]

## Sheet: Sheet1
Metabolites	RT (min)	Mode	Precursor Ion (m/z)	Product Ion (m/z)	DP (V)	CE (V)
L-Alanine	7.87	Pos	90	44	25	17
3-(1-pyrazol-1-yl)-L-alanine	N/A	Pos	156	88	80	17
N-Acetyl-L-alanine	8.02	Pos	132	90	30	30
L-Leucine	4.62	Pos	132	86	50	18
N-Carbamoyl-Beta-Alanine	8.02	Pos	133	115	40	12
L-Argininosuccinate	16.86	Pos	291	70	50	54
L-Asparagine	10.11	Pos	133	87	30	2
L-Aspartate	12.23	Pos	134	88	25	21
4-Aminobutyric acid	14.29	Pos	104	87	41	15
3-Aminoisobutyrate	3.68	Pos	104	58	50	20
L-Glutamate	10.32	Pos	148	84	25	23
Phenylacetyl-L-glutamine	8.96	Pos	265	248	30	15
Phenylalanine	4.52	Pos	166	120	50	19
N-Monomethyl-L-arginine	9.92	Pos	189	70	60	40
L-Isoleucine	4.98	Pos	132	86	50	18
L-Arginine	14.55	Pos	175	70	25	32
N,N-Dimethylarginine	12.4	Pos	203	70	50	40
Proline	6.1	Pos	116	70	50	20
Hydroxy proline	7.94	Pos	132	68	50	18
Ornithine	16.04	Pos	133	70	16	25
1,4-diaminobutane	1.83	Pos	89	45	41	21
L-Citrulline	10.54	Pos	176	70	30	27
Threonine	8.49	Pos	120	74	50	20
N-Acetyl-L-methionine	N/A	Pos	192	146	30	30
L-Methionine	5.46	Pos	150	61	40	31
L-Cystine	N/A	Pos	241	109	30	37
Cystamine	9.6	Pos	153	108	50	30
L-Homocystine	N/A	Pos	269	90	50	20
5-deoxy-5-methylthioadenosine	1.93	Pos	298	136	40	20
S-Adenosyl-L-homocysteine	10.71	Pos	385	136	60	25
S-Adenosyl-L-methionine	17	Pos	399	250	50	25
L-Cysteine	8.49	Pos	122	76	25	20
S-(2-Aminoethyl)-L-cysteine	8.42	Pos	165	120	46	19
Guanidinoacetate	5.93	Pos	118	72	25	18
L-Serine	9.79	Pos	106	60	25	18
Phosphoserine	N/A	Pos	186	130	56	22
Homoserine	8.5	Pos	120	74	50	40
DL-Homoserine Lactone	N/A	Pos	103	74	46	19
2-Oxobutyrate	8.49	Pos	103	57	21	11
Choline	3.68	Pos	105	60	50	27
Glycine	8.8	Pos	76	30	55	25
Valine	5.92	Pos	118	72	25	18
Sarcosine	8.23	Pos	91	73	46	17
Creatine	8.02	Pos	132	90	35	20
2-Furoylglycine	14.36	Pos	170	95	50	30
Glutamine	9.64	Pos	147	84	25	25
Cinnamoylglycine	12.05	Pos	206	131	50	20
2-Aminoadipate	9.32	Pos	162	98	46	25
Lysine	15.18	Pos	147	84	25	25
N6-Acetyl-L-Iysine	N/A	Pos	189	126	25	30
Carnitine	7.27	Pos	162	85	25	29
1-Methylhistamine	6.14	Pos	126	109	30	20
Histamine	4.49	Pos	112	95	40	26
Histidine	14.75	Pos	156	110	25	21
1-Methylhistidine	13.59	Pos	170	124	30	20
Carnosine	15.25	Pos	227	110	40	33
N-Acetyl-L-leucine	1.98	Pos	174	128	30	15
Tyrosine	6.16	Pos	182	136	25	19
Acetoacetate	N/A	Pos	103	70	40	20
Dopamine	N/A	Pos	154	137	50	16
4-Pyridoxic acid	18.36	Pos	184	166	50	20
Tryptophan	4.61	Pos	205	146	75	25
Tryptophol	3.09	Pos	162	144	61	19
Quinolinic acid	2.09	Pos	168	149.9	41	15
N-Acetyl-L-tryptophan	3.29	Pos	247	188	30	20
5-Hydroxytryptophan	5.45	Pos	221	13	30	35
Tryptamine	4.12	Pos	161	144	36	15
Anthranilate	7.99	Pos	138	120	36	15
Xanthurenic acid	4.59	Pos	206	160	56	27
L-Kynurenine	17.05	Pos	209	192	40	13
3-Hydroxykynurenine	N/A	Pos	225	162	30	25
Kynurenic acid	8.84	Pos	190.2	144	51	30
3-Hydroxyanthranilate	8.02	Pos	154	80	46	36
Melatonin	3.6	Pos	233	174	35	18
Indole-3-lactic acid	N/A	Pos	206	130	36	39
Lipoamide	4.61	Pos	206	189	41	15
Indole-3-acetic acid	4.07	Pos	176.2	130	56	25
Serotonin	10.54	Pos	177	160	50	32
Hydroxybutyrate	N/A	Pos	105	87	70	10
4-Guanidinobutyric acid	4.53	Pos	146	87	76	25
Spermidine	4.51	Pos	146	72	46	18
Methylhydroxyisobutyrate	N/A	Pos	119	87	30	12
Creatinine	3.02	Pos	114	44	75	35
N1-Acetylspermidine	13.6	Pos	188	72	100	40
Spermine	N/A	Pos	203	129	40	25
2-Hydroxyphenylacetic acid	5.47	Pos	153	107	50	20
Pyroglutamic Acid	9.62	Pos	130	84	75	22
Salicylurate	N/A	Pos	196	152	30	15
Thymidine	N/A	Pos	243	127.2	30	35
2’-deoxyuridine	3.6	Pos	229	112.9	60	25
2’-deoxyadenosine	2.58	Pos	252	135.9	40	30
Uridine	2.95	Pos	245	113.1	42	14
Adenosine	2.99	Pos	268	136	20	30
2’-deoxyinosine	2.65	Pos	253	136.9	30	20
2’-deoxycytidine	3.57	Pos	228	111.9	40	27
Inosine	2.97	Pos	269	137.1	30	2
Guanosine	5.02	Pos	284	152.1	16	16
2’-deoxyGuanosine	4.08	Pos	268	151.9	20	24
Cytidine	4.5	Pos	244	112.1	30	26
5-methylcytosine	4.52	Pos	126.1	85	21	16
Adenine	2.74	Pos	136	119	50	30
Guanine	4.05	Pos	152	135	40	30
7-Methylguanine	3.16	Pos	166	124	50	30
Thymine	6.11	Pos	127	110	40	16
Uracil	3.5	Pos	113	70	71	29
6-methyl uracil	3.8	Pos	127	84	50	25
Xanthine	N/A	Pos	153	110	40	21
Xanthosine	6.6	Pos	285	63	41	27
1-Methyladenosine	N/A	Pos	282.01	150	28	25
6-Methyladenosine	N/A	Pos	282	150	30	20
N2,N2-dimethylguanosine	N/A	Pos	312	180.2	22	19
N4-acetylcytidine	8	Pos	286	154	20	19
8-hydroxy-2’-deoxyguanosine	N/A	Pos	284	168.1	25	12
2’-O-methylcytidine	2.93	Pos	258	112.1	25	20
5-hydroxymethyl-2’-deoxyuridine	N/A	Pos	259	143.1	25	12
5-methylcytidine	4.03	Pos	258	126.1	22	16
Tetrahydrouridine	3.02	Pos	249	136	30	15
5-methyluridine	3.45	Pos	259	127.1	20	18
1-Methylguanosine	3.4	Pos	298	166	35	20
N2-methylguanosine	3.4	Pos	298	166.2	15	16
N2,N2,N7-trimethylguanosine	4.17	Pos	326	194.1	30	22
2’-O-methyladenosine	9.81	Pos	282	136.1	30	15
2’-O-methyluridine	N/A	Pos	259	113.1	20	18
5-methyl-2’-deoxycytidine	6.14	Pos	242	126.1	16	28
Tubercidin	N/A	Pos	267	135.2	30	28
Pseudouridine	4.63	Pos	245	125	30	14
8-hydroxyguanosine	N/A	Pos	300	168	35	20
N1-methylionsine	N/A	Pos	283	151	35	22
5’-dehydro-2’-deoxyinosine	N/A	Pos	251	137	50	23
N6,N6-Dimethyladenosine	N/A	Pos	296	164	25	17
cAMP	12.65	Pos	330	135.9	50	60
dCMP	N/A	Pos	308	230.2	30	22
dTMP	9.74	Pos	323	81	20	19
CMP	14.29	Pos	324	112	20	18
UMP	11.66	Pos	325	97	20	14
dAMP	15.18	Pos	332	136	20	23
dGMP	N/A	Pos	348	135	20	38
AMP	11.47	Pos	348	136	20	23
ADP	12.51	Pos	428	136	67	26
IMP	11.52	Pos	349	137	20	21
GMP	14.03	Pos	364	152	20	21
ATP	N/A	Pos	508	410	20	25
dATP	N/A	Pos	492	136.1	20	40
GTP	15.36	Pos	524	152	30	45
d GTP	N/A	Pos	508	152	30	44
CTP	N/A	Pos	484	112.1	30	49
d CTP	N/A	Pos	468	112.1	30	43
UTP	N/A	Pos	485	227	20	32
Allantoin	3.39	Pos	159	116	50	11
Riboflavin	3.46	Pos	377	63	31	30
Pyridoxine	9.61	Pos	170	152	40	17
Pyridoxal	2.05	Pos	168	150	51	79
Pyridoxamine	12.13	Pos	169	123	21	23
Thiamine	5.49	Pos	265	122	46	18
Thiamine monophosphate	N/A	Pos	345	122	66	29
Cobalamin	N/A	Pos	678	147	60	52
Cysteamine	N/A	Pos	78	61	40	16
Taurine	6.14	Pos	126	108	50	20
Caffeine	N/A	Pos	195	138	35	30
Phosphocholine	7.25	Pos	184	125	66	20
Acetylcholine	N/A	Pos	164	87	90	25
Nicotinamide	1.81	Pos	123	80	30	30
Nicotinic acid	2.66	Pos	124	80	56	31
Gluconolactone	N/A	Pos	179	133	46	15
Xylitol	N/A	Pos	153	95	41	19
Glucosamine	12.06	Pos	180	162	50	10
L-Arabinose	N/A	Pos	151	107	51	35
Glycerol	N/A	Pos	93	57	30	10
L-Canavanine	N/A	Pos	177	76	56	35
Mevalonolactone	N/A	Pos	131	69	41	19
Phosphoethanoloamine	N/A	Pos	142	44	50	20
1,3-Dimethyl uric acid	N/A	Pos	197	140	50	30
Aldosterone	10.91	Pos	361	163	50	20
Dihydrofolate	N/A	Pos	444.2	178	60	32
5-Methyltetrahydrofolate	N/A	Pos	460.1	313.1	50	21
Folate	7.31	Pos	442	295	50	18
Betaine	5.13	Pos	118	58	40	41
Trimethylamine-N-oxide	4.22	Pos	76	58	25	35
Cotinine	N/A	Pos	177	80	60	34
Methyl-OH-isobutyrate	N/A	Pos	119	87	30	12
Try-ol	2.97	Pos	190.8	130	50	20
2-Deoxy-D-ribose	11.92	Neg	134	117	-30	-15
Ribose 5-Phosphate	11.84	Neg	229	79	-30	-19
Xylose-5P	10.03	Neg	229	139	-30	-19
Xylose	2.94	Neg	149	89	-50	-8
Erythrose 4-Phosphate	7.8	Neg	199	97	-40	-16
Glycerate	9.73	Neg	105	75	-50	-15
Glyceraldehyde	2.04	Neg	89	59	-35	-10
Glycerol-3-Phosphate	11.13	Neg	171	79	-50	-22
2-Oxoglutarate	9.55	Neg	145	101	-20	-12
Citrate	10.23	Neg	191	87	-35	-19
Isocitrate	5.83	Neg	191	73	-35	-19
Fumarate	4.37	Neg	115	71	-30	-15
L-Malate	9.06	Neg	133	115	-40	-14
Oxaloacetate	1.82	Neg	131	87	-47	-12
2-Methylglutaric acid	NA	Neg	145	101	-30	-30
Glutaric Acid	1.78	Neg	131	87	-50	-20
Succinate	2.01	Neg	117	99	-30	-16
Methylmalonic acid	2.01	Neg	117	55	-34	-30
Succinyl Co-enzyme A	N/A	Neg	866	159	-16	-22
Aconitate	2.19	Neg	173	129	-25	-12
Methylsuccinic acid	N/A	Neg	131	87	-50	-30
Malonate	1.82	Neg	103	59	-40	-15
2-Oxobutyrate	2.67	Neg	101	57	-40	-10
Acetoacetate	2.68	Neg	101.01	57	-40	-15
Cystathionine	16.2	Neg	221	134	-75	-20
N-AcetylGlycine	4.91	Neg	116	74	-75	-18
Guanidinoacetate	5.84	Neg	116	70	-47	-15
Butyrate	N/A	Neg	87	45	-30	-10
L-Serine	9.72	Neg	104	74	-25	-20
L-Threonine	8.4	Neg	118	74	-25	-20
4-Hydroxyphenylpyruvate	N/A	Neg	179	107	-40	-12
Phosphotyrosine	15.2	Neg	260	79	-50	-30
3-Nitro-tyrosine	6.1	Neg	225	179.3	-50	-16
Homogentisate	N/A	Neg	167	123	-50	-23
Salicylic acid	1.92	Neg	137	93	-35	-20
Homovanillate	N/A	Neg	181	137	-50	-12
2-Aminoadipate	3.85	Neg	160	116	-60	-18
N-Acetylglutamate	N/A	Neg	188	143	-35	-18
Citrulline	10.48	Neg	174	131	-60	-17
Hippuric Acid	8.41	Neg	178	134	-50	-17
β-hydroxypyruvate	N/A	Neg	103	59	-20	-14
Pyruvate	2.73	Neg	87	43	-35	-14
Phenylpyruvate	N/A	Neg	163	91	-25	-12
L-Asparagine	10.02	Neg	131	113	-25	-20
L-Aspartate	11.92	Neg	132	88	-80	-20
Creatine phosphate	17.21	Neg	210	79	-35	-24
Glucuronate	N/A	Neg	193	113	-60	-22
UDP-glucuronate	19.49	Neg	579	403	-50	-28
Glucose	6.53	Neg	179	119	-50	-20
Sorbose	6.53	Neg	179	89	-40	-12
Glucose 6-phosphate	15.28	Neg	259	199	-50	-17
Fructose 6-phosphate	15.26	Neg	259	169	-35	-20
Fructose 1,6-bisphosphate	12.71	Neg	339	241	-37	-20
Glyceraldehyde 3-Phosphate	10.37	Neg	169	97	-35	-16
DHAP	11.99	Neg	169	79	-40	-16
Glycerate 2-P	14.13	Neg	185	79	-40	-30
3-Phosphoglycerate	14.45	Neg	185	97	-40	-20
Phosphoenolpyruvate	12.63	Neg	167	79	-30	-28
Acetyl Coenzyme A	N/A	Neg	808	159	-60	-60
Thiamine pyrophosphate	N/A	Neg	424	382	-10	-24
Fucose	N/A	Neg	163	103	-55	-10
Sorbitol	5.96	Neg	181	89	-60	-20
Lactose	10.94	Neg	341	161	-50	-11
Maltose	10.95	Neg	341	161	-40	-12
Trehalose	4.8	Neg	341	59	-80	-52
Melibiose	10.71	Neg	341	89	-50	-28
Glucosamine	N/A	Neg	178	145	-30	-12
Glucosamine 6-Phosphate	N/A	Neg	258	79	-54	-60
N-acetylglucosamine	4.83	Neg	220	119	-60	-10
N-acetylglucosamine phosphate	12.84	Neg	300	199	-75	-20
UDP-GlcNAc	15.99	Neg	606	159	-50	-66
Nicotinate	2.66	Neg	122	78	-35	-18
Nicotinate ribonucleotide	N/A	Neg	334	290	-50	-13
2-oxo-4-methylthiobutanoate	4.89	Neg	147	99	-50	-13
Cystine	10.23	Neg	239	97	-50	-28
Homocystine	N/A	Neg	267	132	-30	-22
Reduced glutathione	11.41	Neg	306	143	-40	-35
Xanthurenate	N/A	Neg	204	160	-30	-30
anthranilate	N/A	Neg	136	92	-30	-18
Quinolinic acid	2.09	Neg	166	122	-30	-13
Pyridine-2,3-dicarboxylate	N/A	Neg	166.01	122	-50	-54
3-hydroxykynurenate	N/A	Neg	223	162	-60	-20
Indoleacetate	4.53	Neg	174	130	-25	-14
5-hydroxyindole-3-acetate	3.84	Neg	190	146	-50	-16
Kynurenate	4.24	Neg	188	144	-50	-20
Taurochenodeoxycholate	N/A	Neg	498	80	-90	-88
Taurocholate	N/A	Neg	514	80	-50	-50
Chenodeoxycholate	N/A	Neg	391	74	-80	-50
Glycochenodeoxycholate	N/A	Neg	448	74	-80	-60
Glycocholate	N/A	Neg	464	74	-50	-60
Cholate	N/A	Neg	407	343	-50	-20
NADH	15.16	Neg	664	408	-50	-40
NADPH	15.15	Neg	744	408	-20	-40
NAD	15.16	Neg	662	540	-75	-35
NADP	16.57	Neg	742	309	-30	-30
Oxidized glutathione	19.91	Neg	611	306	-30	-30
Ascorbate	4.52	Neg	175	115	-40	-17
Pyroglutamic acid	4.9	Neg	128	82	-30	-19
Orotate	4.61	Neg	155	111	-50	-16
L-Dihydroorotate	4.82	Neg	157	113	-35	-12
Allantoin	3.35	Neg	157	114	-80	-17
Urate	5.03	Neg	167	124	-75	-19
Glyoxylate	N/A	Neg	73	45	-50	-14
Adenylosuccinate	N/A	Neg	462	79	-75	-50
Guanosine-diphosphate	12.14	Neg	442	159	-35	-30
Guanosine-monophosphate	13.9	Neg	362	97	-26	-45
Guanosine-triphosphate	19.22	Neg	522	159	-24	-40
Inosine 5'-monophosphate	11.34	Neg	347	135	-30	-40
Thymidine 5 phosphate	9.5	Neg	321	79	-47	-60
Adenosine 5 monophosphate	11.3	Neg	346	134	-20	-45
Adenosine 5'-triphosphate	N/A	Neg	506	408	-25	-40
Adenosine 5'-diphosphate	N/A	Neg	426	134	-22	-30
Cytidine 5'-monophosphate	10.19	Neg	322	110	-75	-35
Cytidine 5-diphosphate	N/A	Neg	402	158	-60	-30
Cytidine 5-triphosphate	N/A	Neg	482	159	-34	-34
2'-Deoxy cytidine 5'-monophosphate	11.38	Neg	306	195	-49	-30
2'-Deoxy cytidine diphosphate	N/A	Neg	386	159	-22	-30
2'-Deoxycytidine 5-triphosphate	N/A	Neg	466	159	-45	-35
Deoxyuridylic acid	13.52	Neg	307	195	-45	-19
Uridine 5'-diphosphate	19.41	Neg	403	159	-18	-35
Uridine 5’-monophosphate	11.46	Neg	323	79	-65	-66
Uridine 5-triphosphate	N/A	Neg	483	159	-22	-45
2'-Deoxyuridine 5'-triphosphate	N/A	Neg	467	159	-26	-40
Orotidine 5'-phosphate	N/A	Neg	367	323.1	-65	-17
Xanthosine 5-monophosphate	11.82	Neg	363	79	-40	-60
Cyclic adenosine monophosphate	11.8	Neg	328	134	-27	-35
Cyclic guanosine monophosphate	N/A	Neg	344	150	-40	-35
Guanosine diphosphate- Fucose	17.64	Neg	588	159	-80	-60
Guanosine diphosphate-Mannose	19.15	Neg	604	159	-60	-70
Uridine diphosphate-glucose	17.04	Neg	565	323	-85	-30
Uracil	2.12	Neg	111	42	-50	-30
2'-Deoxyadenosine	4.82	Neg	250	134	-60	-24
Hypoxanthine	2.86	Neg	135	92	-50	-22
Xanthine	3.21	Neg	151	108	-50	-22
3-Methylxanthine	N/A	Neg	165	122	-50	-40
Adenine	2.71	Neg	134	107	-85	-30
Xanthosine	4.29	Neg	283	151	-50	-21
Malonyl Co-enzyme A	N/A	Neg	853	159	-90	-60
Carbamoyl phosphate	10.67	Neg	140.01	79	-80	-86
Coenzyme A	N/A	Neg	766	159	-20	-80
Palmitate	N/A	Neg	255	69	-70	-39
FAD	14.1	Neg	784	437	-40	-40
Pyridoxal-5-Phosphate	5.42	Neg	246	97	-40	-30
4-Pyridoxate	N/A	Neg	182	138	-80	-30
Folate	N/A	Neg	440	311	-50	-30
Folinate	N/A	Neg	472	315	-50	-40
Dihydrofolate	N/A	Neg	442	176	-70	-30
5-Methyltetrahydrofolate	N/A	Neg	458	329	-50	-22
Neopteron	N/A	Neg	252	192	-50	-22
D-Arabino-1,4-lactone	2.07	Neg	147	59	-50	-15
Inositol	10.23	Neg	179	81	-65	-26
myo-inositol	10.23	Neg	179	87	-40	-12
Itaconate	2.17	Neg	129	85	-40	-19
Pantothenate	2.16	Neg	218	88	-30	-14
N-Acetyl-beta-alanine	7.93	Neg	130	88	-25	-20
Shikimate	1.22	Neg	173	93	-40	-26
2-Hydroxy-2-methylbutanedioic acid	10.17	Neg	147	85	-50	-13
glycolate	N/A	Neg	75	47	-65	-15
Propionate	N/A	Neg	73	55	-60	-20
Salicylurate	3.41	Neg	194	150	-50	-22
Sialate	11.41	Neg	308	170	-75	-34
CMP-Sialic acid	16.18	Neg	613	322	-30	-24
acetyl phosphate	12.49	Neg	139	63	-30	-50
3-Hydroxy-3-methylglutaric acid	3.81	Neg	161	99	-45	-30
2,3-Dihydroxybenzoate	N/A	Neg	153	109	-30	-36
Bilirubin	1.18	Neg	583	285	-60	-18
Biotin	2.95	Neg	243	42	-57	-50
Geranyl pyrophosphate	N/A	Neg	313	79	-50	-35
Lactate	2.93	Neg	89	71	-45	-16
O-Nitrophenol	N/A	Neg	138	108	-80	-54
Phytate	11.28	Neg	329	79	-40	-45
Oxalate	3.06	Neg	89	61	-40	-12
O-p-Serine	N/A	Neg	184	97	-20	-10
