# Supplementary figures and images for: MS-Based Metabolomics Reveals Metabolic Dysregulation in Erastin-Induced Gastric Adenocarcinoma Cells
Source: Research Square preprint supplement (doi:10.21203/rs.3.rs-927028/v1), 2021-09-30

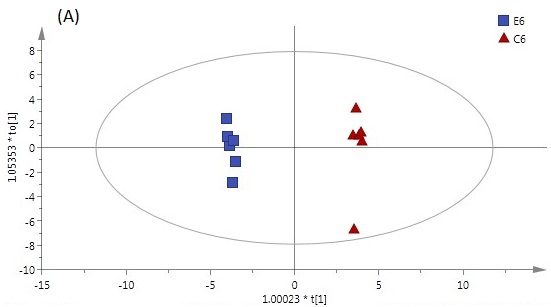

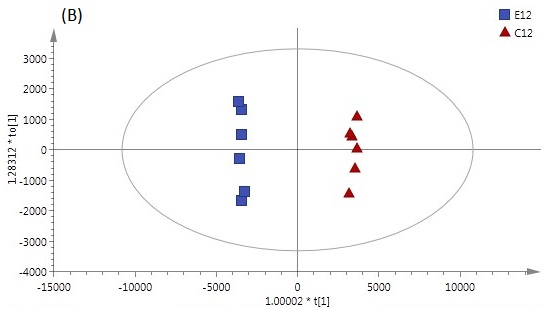


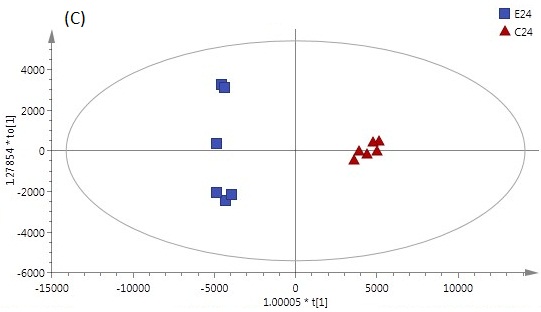

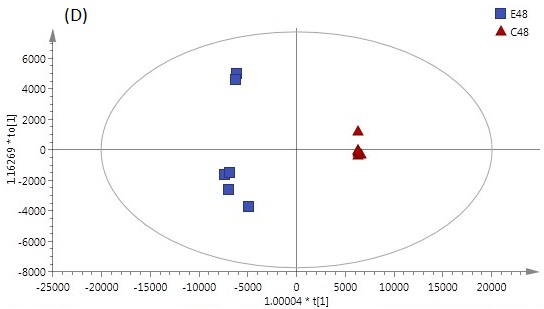


Figure S1. OPLS-DA score plot of erastin-treated MGC-803 cells and the controls: (A) 6h, (B) 12h, (C) 24h, (D) 48h.

Supplement: Supplementary file 5 [file 859ee459d821ef1503458f2b.docx]
